# Supplementary material
Source: publisher figshare collection journal article supplement (https://sage.figshare.com/ndownloader/files/18725093)
Supplement: Supplementary file 1 [file 18725093]

**Appendix A**

| **Session #** | **Lesson title** |
| --- | --- |
| 1 | SQUIRE Introduction |
| 2 | Creating a story arc |
| 3 | SQUIRE- Writing an effective methods section |
| 4 | Twelve tips to better papers |
| 5 | SQUIRE - Writing an effective results section, tables, and charts |
| 6 | Nuts and bolts of getting your paper published |
| 7 | SQUIRE: Writing an effective discussion section |
| 8 | Editing and copy editing |
| 9 | Writing an effective abstract |
| 10 | Hitting submit and responding to reviewers; course feedback |
